# Supplementary material
Source: PubMed Central journal article supplement (PMC8295157)
Supplement: 10822_2021_397_MOESM1_ESM.pdf [file 10822_2021_397_MOESM1_ESM.pdf]

## 11 Supplementary Information

### 11.1 Supplementary figures and tables

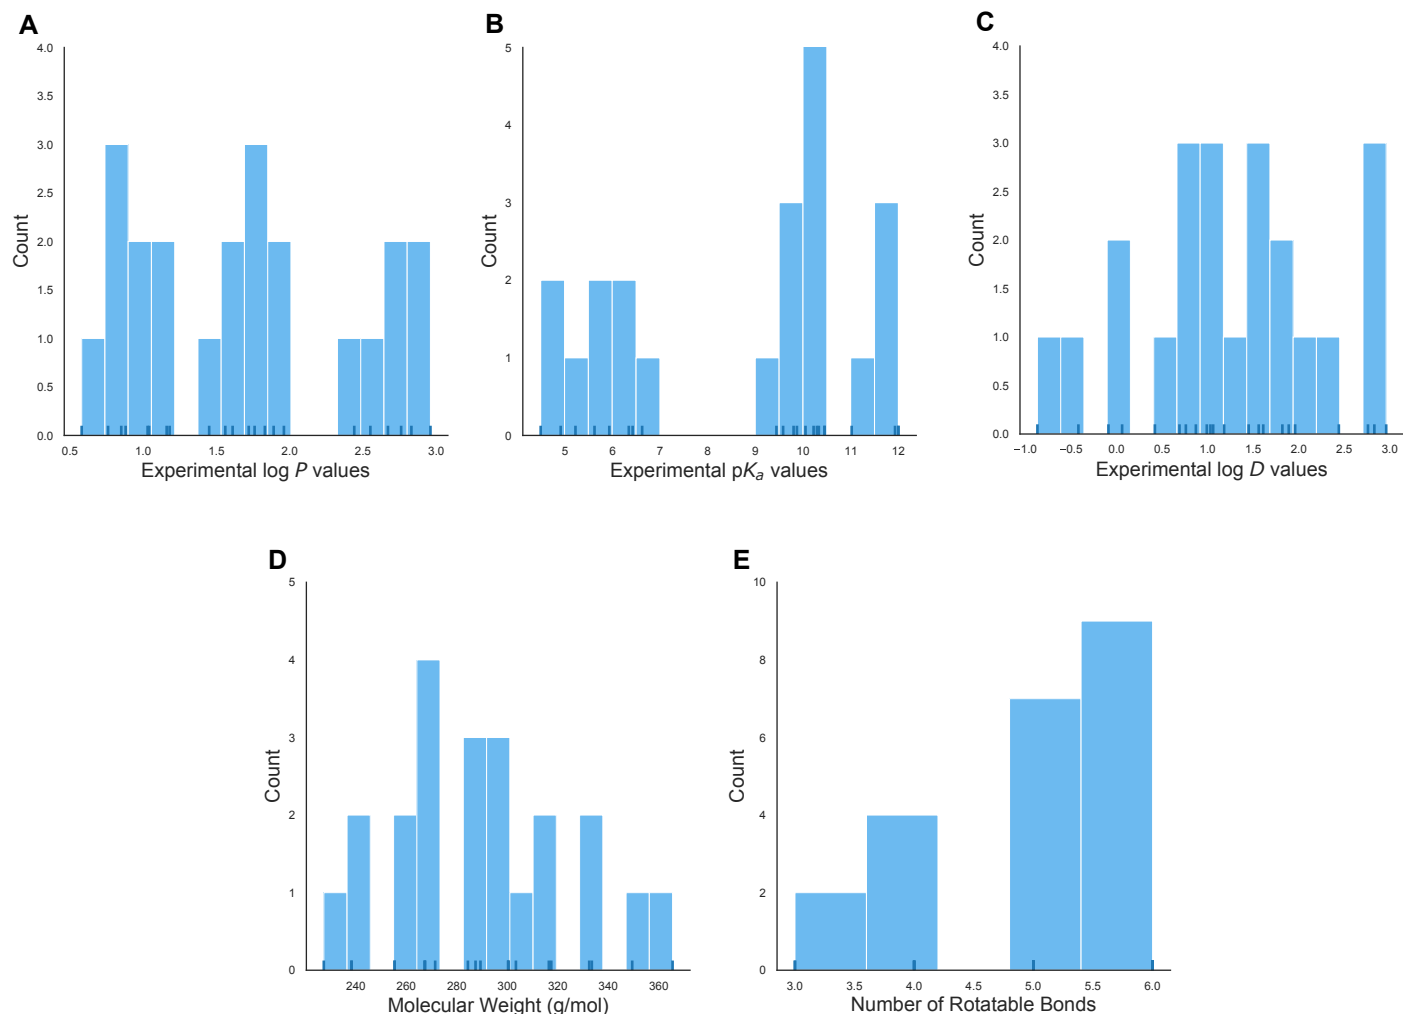

**Figure S1. Distribution of molecular properties of the 22 compounds from the SAMPL7 physical property blind challenge. (A)** Histogram of log  $P$  measurements collected with Sirius T3 instrument. The ticks along the x-axis indicate the individual values. Compounds have experimental log  $P$  values in the range of 0.58-2.96. **(B)** Histogram of  $pK_a$  measurements collected with Sirius T3 instrument. Eight compounds have measured  $pK_a$ 's in the range of 4.49–6.62 and eleven in the range 9.58–11.93. Two compounds are included here as having  $pK_a$ 's of 12, but actually had experimental values greater than 12, and were therefore outside of the experimental detection range. **(C)** Histogram of log  $D$  measurements between n-octanol and aqueous buffer at pH 7.4 were determined via potentiometric titrations using a Sirius T3 instrument, except for compounds SM27, SM28, SM30-SM34, SM36-SM39 which had log  $D_{7.4}$  values determined via shake-flask assay. log  $D$  measurements ranged from -0.87-2.96. **(D)** Histogram of molecular weights calculated for the compounds in the SAMPL7 dataset. The molecular weight ranged from 227-365 Da. **(E)** Histogram of the number of rotatable bonds in each molecule. The number of rotatable bonds in challenge molecules ranged from 3-6.

**Table S1. Evaluation statistics calculated for all methods in the log P challenge.** Submitted predictions are represented by their method name. There are six error metrics reported: the root-mean-squared error (RMSE), mean absolute error (MAE), mean (signed) error (ME), coefficient of determination (R<sup>2</sup>), linear regression slope (m), and Kendall's Rank Correlation Coefficient ( $\tau$ ), and error slope (ES). The mean and 95% confidence intervals of each statistic is presented. This table is ranked by increasing RMSE.

| Method Name                         | Category      | Submission Type | RMSE              | MAE               | ME                   | R <sup>2</sup>    | m                    | Kendall's Tau        | ES                   |
|-------------------------------------|---------------|-----------------|-------------------|-------------------|----------------------|-------------------|----------------------|----------------------|----------------------|
| <i>ClassicalGSG DB2</i>             | Empirical     | Blind           | 0.55 [0.38, 0.69] | 0.44 [0.31, 0.58] | 0.05 [-0.20, 0.26]   | 0.51 [0.18, 0.82] | 0.71 [0.36, 1.06]    | 0.51 [0.18, 0.78]    | 0.81 [0.62, 1.03]    |
| <i>TFE MLR</i>                      | Empirical     | Blind           | 0.58 [0.34, 0.83] | 0.41 [0.26, 0.60] | -0.04 [-0.30, 0.19]  | 0.43 [0.06, 0.80] | 0.60 [0.21, 0.95]    | 0.56 [0.23, 0.82]    | 1.38 [1.27, 1.45]    |
| <i>ClassicalGSG DB4</i>             | Empirical     | Blind           | 0.65 [0.50, 0.78] | 0.55 [0.41, 0.69] | 0.25 [0.01, 0.50]    | 0.51 [0.19, 0.76] | 0.82 [0.39, 1.22]    | 0.45 [0.15, 0.71]    | 0.57 [0.46, 0.85]    |
| <i>Chemprop</i>                     | Empirical     | Blind           | 0.66 [0.39, 0.88] | 0.48 [0.30, 0.68] | -0.17 [-0.44, 0.08]  | 0.41 [0.11, 0.76] | 0.69 [0.31, 1.08]    | 0.54 [0.25, 0.82]    | 1.03 [0.79, 1.21]    |
| <i>TFE-SM8-vacuum-opt</i>           | Physical (QM) | Blind           | 0.67 [0.45, 0.86] | 0.51 [0.33, 0.69] | 0.15 [-0.13, 0.42]   | 0.45 [0.11, 0.75] | 0.80 [0.33, 1.23]    | 0.50 [0.18, 0.76]    | 0.99 [0.75, 1.20]    |
| <i>GROVER</i>                       | Empirical     | Blind           | 0.69 [0.41, 0.96] | 0.49 [0.31, 0.71] | -0.21 [-0.50, 0.05]  | 0.33 [0.04, 0.70] | 0.56 [0.18, 0.92]    | 0.37 [0.05, 0.66]    | 0.87 [0.62, 1.09]    |
| <i>ClassicalGSG DB1</i>             | Empirical     | Blind           | 0.76 [0.56, 0.96] | 0.62 [0.45, 0.82] | 0.10 [-0.23, 0.40]   | 0.28 [0.06, 0.60] | 0.61 [0.26, 0.99]    | 0.36 [0.04, 0.63]    | 0.63 [0.43, 0.85]    |
| <i>ffsampled_deeplearning_cl1</i>   | Empirical     | Blind           | 0.77 [0.44, 1.04] | 0.51 [0.29, 0.77] | -0.25 [-0.58, 0.04]  | 0.31 [0.05, 0.70] | 0.63 [0.24, 1.05]    | 0.42 [0.06, 0.74]    | 0.99 [0.72, 1.19]    |
| <i>ClassicalGSG DB3</i>             | Empirical     | Blind           | 0.77 [0.57, 0.96] | 0.62 [0.43, 0.82] | -0.15 [-0.46, 0.16]  | 0.51 [0.18, 0.78] | 1.08 [0.55, 1.59]    | 0.48 [0.15, 0.75]    | 0.60 [0.42, 0.89]    |
| <i>COSMO-RS</i>                     | Physical (QM) | Blind           | 0.78 [0.49, 1.01] | 0.57 [0.36, 0.80] | -0.30 [-0.61, -0.01] | 0.49 [0.17, 0.79] | 0.97 [0.49, 1.45]    | 0.53 [0.25, 0.78]    | 0.97 [0.74, 1.18]    |
| <i>TFE_Attentive_FP</i>             | Empirical     | Blind           | 0.79 [0.47, 1.07] | 0.57 [0.36, 0.82] | -0.18 [-0.53, 0.12]  | 0.19 [0.00, 0.61] | 0.44 [0.04, 0.87]    | 0.34 [-0.02, 0.69]   | 0.93 [0.69, 1.13]    |
| <i>ffsampled_deeplearning_cl2</i>   | Empirical     | Blind           | 0.82 [0.48, 1.11] | 0.56 [0.32, 0.83] | -0.37 [-0.69, -0.08] | 0.36 [0.07, 0.72] | 0.73 [0.31, 1.16]    | 0.40 [0.07, 0.69]    | 0.94 [0.67, 1.15]    |
| <i>TFE-SM12-vacuum-opt</i>          | Physical (QM) | Blind           | 0.82 [0.61, 1.02] | 0.66 [0.47, 0.87] | 0.28 [-0.06, 0.60]   | 0.41 [0.08, 0.72] | 0.90 [0.36, 1.42]    | 0.39 [0.05, 0.67]    | 0.88 [0.65, 1.09]    |
| <i>TFE-SM8-solvent-opt</i>          | Physical (QM) | Blind           | 0.97 [0.71, 1.20] | 0.78 [0.55, 1.02] | 0.65 [0.35, 0.94]    | 0.42 [0.10, 0.70] | 0.83 [0.35, 1.31]    | 0.44 [0.13, 0.69]    | 0.71 [0.47, 0.94]    |
| <i>REF1 ChemAxon</i>                | Empirical     | Reference       | 1.00 [0.79, 1.20] | 0.85 [0.63, 1.08] | 0.46 [0.08, 0.83]    | 0.39 [0.10, 0.70] | 0.98 [0.45, 1.53]    | 0.40 [0.09, 0.68]    | 0.13 [-0.00, 0.29]   |
| <i>TFE IEFFPCM MST</i>              | Physical (QM) | Blind           | 1.03 [0.65, 1.41] | 0.80 [0.56, 1.10] | -0.07 [-0.53, 0.33]  | 0.27 [0.01, 0.68] | 0.85 [0.12, 1.50]    | 0.42 [0.10, 0.70]    | 1.07 [0.88, 1.23]    |
| <i>TFE MD neat oct (GAFF/TIP4P)</i> | Physical (MM) | Blind           | 1.11 [0.74, 1.43] | 0.83 [0.52, 1.15] | -0.74 [-1.10, -0.40] | 0.56 [0.24, 0.82] | 1.25 [0.64, 1.83]    | 0.58 [0.27, 0.82]    | 1.30 [1.19, 1.40]    |
| <i>NULL0 mean clogP FDA</i>         | Empirical     | Reference       | 1.20 [0.94, 1.42] | 1.01 [0.73, 1.28] | -0.96 [-1.26, -0.64] | 0.00 [0.00, 0.00] | 0.00 [-0.00, 0.00]   | nan [nan, nan]       | 0.18 [0.04, 0.32]    |
| <i>NES-1 (GAFF2/OPC3) G</i>         | Physical (MM) | Blind           | 1.21 [0.92, 1.51] | 1.03 [0.78, 1.31] | -0.13 [-0.63, 0.37]  | 0.22 [0.01, 0.59] | 0.88 [0.15, 1.59]    | 0.34 [0.02, 0.63]    | 1.23 [1.11, 1.33]    |
| <i>NES-1 (GAFF2/OPC3) J</i>         | Physical (MM) | Blind           | 1.28 [0.97, 1.58] | 1.08 [0.81, 1.38] | 0.01 [-0.54, 0.53]   | 0.21 [0.01, 0.63] | 0.92 [0.09, 1.76]    | 0.33 [0.00, 0.64]    | 1.21 [1.08, 1.33]    |
| <i>NES-1 (GAFF2/OPC3) B</i>         | Physical (MM) | Blind           | 1.42 [1.02, 1.81] | 1.13 [0.79, 1.51] | -0.51 [-1.08, 0.05]  | 0.27 [0.02, 0.65] | 1.11 [0.30, 1.91]    | 0.36 [0.05, 0.65]    | 1.17 [1.01, 1.31]    |
| <i>MD (GAFF/TIP3P)</i>              | Physical (MM) | Blind           | 1.43 [1.15, 1.71] | 1.30 [1.06, 1.56] | -1.30 [-1.56, -1.06] | 0.48 [0.22, 0.79] | 0.77 [0.45, 1.12]    | 0.55 [0.28, 0.80]    | 0.94 [0.80, 1.09]    |
| <i>TFE wet oct (GAFF/TIP4P)</i>     | Physical (MM) | Blind           | 1.47 [1.16, 1.77] | 1.30 [1.03, 1.60] | -1.30 [-1.60, -1.03] | 0.42 [0.10, 0.75] | 0.80 [0.30, 1.30]    | 0.47 [0.14, 0.75]    | 1.15 [1.03, 1.27]    |
| <i>TFE-NHLBI-TZVP-QM</i>            | Physical (QM) | Blind           | 1.55 [1.19, 1.88] | 1.34 [1.02, 1.67] | 1.32 [1.00, 1.67]    | 0.52 [0.19, 0.78] | 1.16 [0.59, 1.65]    | 0.51 [0.19, 0.78]    | 0.05 [-0.00, 0.17]   |
| <i>0.05 MD (CGenFF/TIP3P)</i>       | Physical (MM) | Blind           | 1.63 [1.25, 1.98] | 1.41 [1.08, 1.76] | -1.38 [-1.74, -1.02] | 0.54 [0.26, 0.82] | 1.26 [0.81, 1.76]    | 0.52 [0.26, 0.76]    | 0.90 [0.70, 1.07]    |
| <i>EC_RISM_wet</i>                  | Physical (QM) | Blind           | 1.84 [1.31, 2.36] | 1.49 [1.07, 1.96] | -1.49 [-1.96, -1.06] | 0.29 [0.05, 0.68] | 0.96 [0.37, 1.57]    | 0.38 [0.08, 0.67]    | 0.67 [0.45, 0.90]    |
| <i>TFE-SMD-vacuum-opt</i>           | Physical (QM) | Blind           | 1.96 [1.60, 2.30] | 1.76 [1.42, 2.13] | 1.76 [1.42, 2.13]    | 0.44 [0.12, 0.68] | 1.04 [0.46, 1.59]    | 0.41 [0.03, 0.70]    | 0.68 [0.50, 0.87]    |
| <i>MD-EE-MCC (GAFF-TIP4P-Ew)</i>    | Physical (MM) | Blind           | 2.06 [1.48, 2.59] | 1.61 [1.09, 2.17] | -0.93 [-1.70, -0.17] | 0.03 [0.00, 0.28] | 0.47 [-0.53, 1.49]   | 0.11 [-0.16, 0.38]   | 0.76 [0.51, 1.03]    |
| <i>MD (OPLS-AA/TIP4P)</i>           | Physical (MM) | Blind           | 2.19 [1.69, 2.65] | 1.82 [1.31, 2.34] | -1.35 [-2.03, -0.60] | 0.28 [0.06, 0.58] | 1.47 [0.58, 2.55]    | 0.36 [0.07, 0.62]    | 0.73 [0.48, 0.97]    |
| <i>TFE b3lypd3</i>                  | Physical (QM) | Blind           | 2.19 [1.76, 2.57] | 1.98 [1.59, 2.37] | 1.98 [1.59, 2.37]    | 0.40 [0.10, 0.67] | 1.06 [0.47, 1.64]    | 0.45 [0.11, 0.72]    | 0.22 [0.09, 0.41]    |
| <i>MD LigParGen (OPLS-AA/TIP4P)</i> | Physical (MM) | Blind           | 2.28 [1.80, 2.71] | 1.95 [1.46, 2.44] | 0.35 [-0.60, 1.29]   | 0.07 [0.00, 0.37] | 0.83 [-0.51, 2.26]   | 0.19 [-0.14, 0.50]   | 0.65 [0.42, 0.88]    |
| <i>TFE-SMD-solvent-opt</i>          | Physical (QM) | Blind           | 2.39 [1.97, 2.78] | 2.19 [1.79, 2.60] | 2.19 [1.79, 2.60]    | 0.40 [0.09, 0.67] | 1.09 [0.45, 1.67]    | 0.42 [0.09, 0.68]    | 0.51 [0.34, 0.68]    |
| <i>Ensemble EPI physprop</i>        | Empirical     | Blind           | 2.73 [2.27, 3.16] | 2.54 [2.13, 2.98] | 2.54 [2.13, 2.98]    | 0.33 [0.04, 0.64] | -0.30 [-0.49, -0.10] | -0.35 [-0.60, -0.03] | -0.00 [-0.00, -0.00] |
| <i>Ensemble Martel</i>              | Empirical     | Blind           | 3.29 [2.89, 3.68] | 3.16 [2.78, 3.55] | 3.16 [2.78, 3.55]    | 0.39 [0.05, 0.73] | -0.25 [-0.40, -0.09] | -0.46 [-0.72, -0.14] | -0.00 [-0.00, -0.00] |
| <i>QSPR_Mordred2D_TPOT_AutoML</i>   | Empirical     | Blind           | 3.64 [3.01, 4.24] | 3.36 [2.80, 3.96] | 3.36 [2.80, 3.96]    | 0.39 [0.10, 0.71] | -0.72 [-1.12, -0.33] | -0.37 [-0.65, -0.04] | -0.00 [-0.00, -0.00] |
| <i>TFE-NHLBI-NN-IN</i>              | Empirical     | Blind           | 3.97 [3.57, 4.34] | 3.85 [3.45, 4.25] | 3.85 [3.45, 4.25]    | 0.00 [0.00, 0.15] | 0.02 [-0.30, 0.34]   | 0.02 [-0.23, 0.27]   | 0.01 [-0.00, 0.02]   |

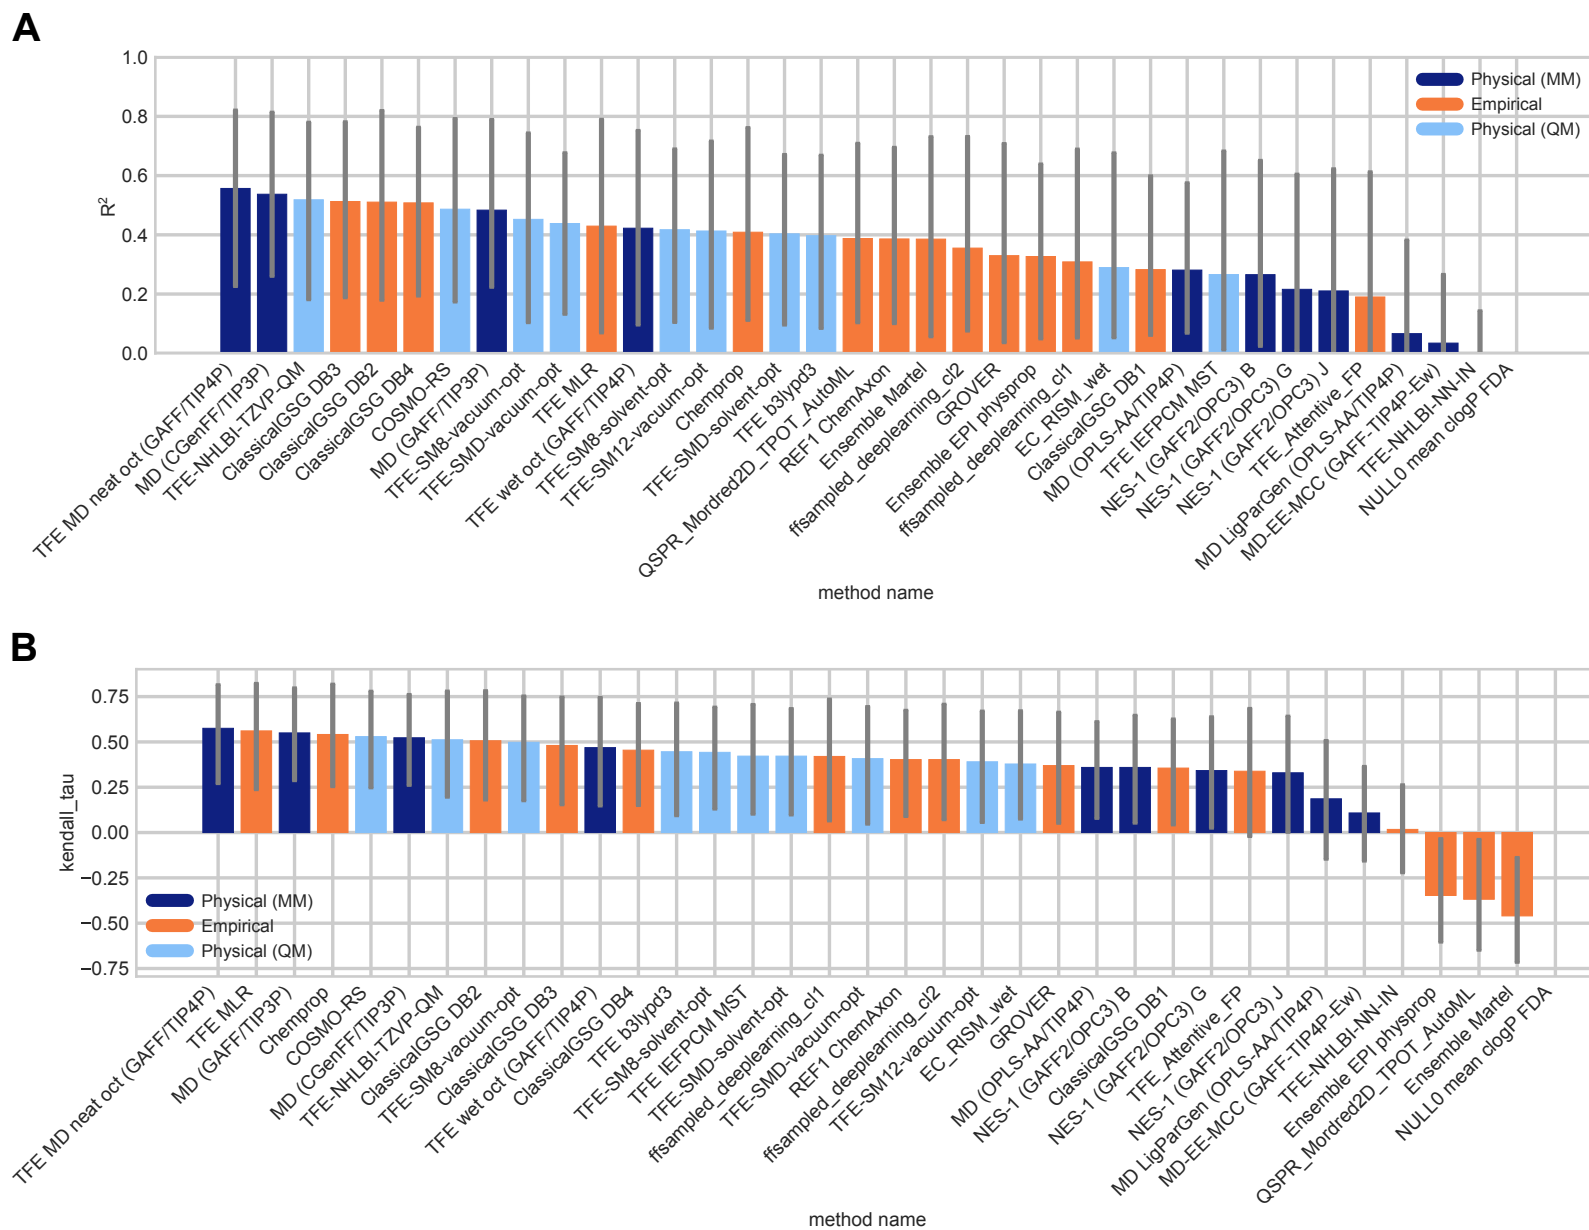

**Figure S2. Overall correlation assessment for all methods participating in the SAMPL7 log  $P$  challenge show that the uncertainty of each correlation statistic is quite high, not allowing a true ranking based on correlation.** Pearson's  $R^2$  and Kendall's Rank Correlation Coefficient Tau ( $\tau$ ) are shown, with error bars denoting 95% confidence intervals obtained by bootstrapping over challenge molecules. Submitted methods are listed in Table 1. The submission *REF1 ChemAxon* was a reference method included after the blind challenge submission deadline, and *NULL0 mean cLogP FDA* is the null prediction method; all others refer to blind predictions. Most methods have a statistically indistinguishable performance on ranking because of the small dynamic range of the dataset. Evaluation statistics calculated for all methods are available in Table S1 of the Supplementary Information.

**Table S2. Details of MM-based physical methods in the log *P* prediction challenge.** Force fields, water models, and octanol phase choice are reported. A dry octanol phase indicates the octanol phase was composed of only octanol. A wet octanol phase indicates the octanol phase was treated as a mixture of octanol and water. RMSE, MAE,  $R^2$ , and Kendall's Tau values are reported as mean and 95% confidence intervals.

| Method Name                         | Force Field | Water Model | Octanol Phase | RMSE              | MAE               | $R^2$             | Kendall's Tau      |
|-------------------------------------|-------------|-------------|---------------|-------------------|-------------------|-------------------|--------------------|
| <i>TFE MD neat oct (GAFF/TIP4P)</i> | GAFF        | TIP4P       | dry           | 1.11 [0.74, 1.43] | 0.83 [0.52, 1.15] | 0.56 [0.24, 0.82] | 0.58 [0.27, 0.82]  |
| <i>NES-1 (GAFF2/OPC3) G</i>         | GAFF2       | OPC3        | dry           | 1.21 [0.92, 1.51] | 1.03 [0.78, 1.31] | 0.22 [0.01, 0.59] | 0.34 [0.02, 0.63]  |
| <i>NES-1 (GAFF2/OPC3) J</i>         | GAFF2       | OPC3        | dry           | 1.28 [0.97, 1.58] | 1.08 [0.81, 1.38] | 0.21 [0.01, 0.63] | 0.33 [0.00, 0.64]  |
| <i>NES-1 (GAFF2/OPC3) B</i>         | GAFF2       | OPC3        | dry           | 1.42 [1.02, 1.81] | 1.13 [0.79, 1.51] | 0.27 [0.02, 0.65] | 0.36 [0.05, 0.65]  |
| <i>MD (GAFF/TIP3P)</i>              | GAFF        | TIP3P       | dry           | 1.43 [1.15, 1.71] | 1.30 [1.06, 1.56] | 0.48 [0.22, 0.79] | 0.55 [0.28, 0.80]  |
| <i>TFE wet oct (GAFF/TIP4P)</i>     | GAFF        | TIP4P       | wet           | 1.47 [1.16, 1.77] | 1.30 [1.03, 1.60] | 0.42 [0.10, 0.75] | 0.47 [0.14, 0.75]  |
| <i>MD (CGenFF/TIP3P)</i>            | CGenFF      | TIP3P       | dry           | 1.63 [1.25, 1.98] | 1.41 [1.08, 1.76] | 0.54 [0.26, 0.82] | 0.52 [0.26, 0.76]  |
| <i>MD-EE-MCC (GAFF-TIP4P-Ew)</i>    | GAFF        | TIP4P-eW    | dry           | 2.06 [1.48, 2.59] | 1.61 [1.09, 2.17] | 0.03 [0.00, 0.28] | 0.11 [-0.16, 0.38] |
| <i>MD (OPLS-AA/TIP4P)</i>           | OPLS-AA     | TIP4P       | dry           | 2.19 [1.69, 2.65] | 1.82 [1.31, 2.34] | 0.28 [0.06, 0.58] | 0.36 [0.07, 0.62]  |
| <i>MD LigParGen (OPLS-AA/TIP4P)</i> | OPLS-AA     | TIP4P       | dry           | 2.28 [1.80, 2.71] | 1.95 [1.46, 2.44] | 0.07 [0.00, 0.37] | 0.19 [-0.14, 0.50] |

**Table S3. Evaluation statistics calculated for all methods in the  $pK_a$  challenge.** Submitted predictions are represented by their method name. There are six error metrics reported: the root-mean-squared error (RMSE), mean absolute error (MAE), mean (signed) error (ME), coefficient of determination ( $R^2$ ), linear regression slope (m), Kendall's Rank Correlation Coefficient ( $\tau$ ), and error slope (ES). The mean and 95% confidence intervals of each statistic is presented. This table is ranked by increasing RMSE.

| Method Name                          | Category | Submission Type | RMSE              | MAE               | ME                  | $R^2$             | m                    | Kendall's Tau        | ES                   |
|--------------------------------------|----------|-----------------|-------------------|-------------------|---------------------|-------------------|----------------------|----------------------|----------------------|
| <i>REF00_Chemaxon_Chemicalize</i>    | QSPR/ML  | Reference       | 0.71 [0.50, 0.90] | 0.56 [0.38, 0.76] | 0.09 [-0.23, 0.38]  | 0.91 [0.86, 0.96] | 0.88 [0.72, 1.02]    | 0.73 [0.51, 0.90]    | 0.83 [0.58, 1.04]    |
| <i>EC_RISM</i>                       | QM       | Blind           | 0.72 [0.45, 0.95] | 0.53 [0.33, 0.75] | 0.20 [-0.10, 0.50]  | 0.93 [0.87, 0.98] | 0.80 [0.72, 0.91]    | 0.81 [0.63, 0.96]    | 1.32 [1.19, 1.42]    |
| <i>IEFPCM/MST</i>                    | QM       | Blind           | 1.82 [1.00, 2.69] | 1.30 [0.84, 1.92] | 0.25 [-0.46, 1.09]  | 0.56 [0.22, 0.87] | 0.86 [0.53, 1.18]    | 0.52 [0.22, 0.76]    | 1.00 [0.80, 1.17]    |
| <i>DFT_M05-2X_SMD</i>                | QM       | Blind           | 2.90 [2.04, 3.69] | 2.28 [1.53, 3.10] | -0.78 [-2.02, 0.41] | 0.03 [0.00, 0.37] | 0.15 [-0.32, 0.53]   | 0.17 [-0.22, 0.54]   | 0.55 [0.31, 0.81]    |
| <i>TZVP-QM</i>                       | QM       | Blind           | 2.90 [2.52, 3.25] | 2.75 [2.34, 3.14] | 1.20 [0.02, 2.33]   | 0.23 [0.03, 0.60] | -0.11 [-0.20, -0.04] | -0.14 [-0.49, 0.23]  | -0.00 [-0.00, -0.00] |
| <i>Standard Gaussian Process</i>     | QSPR/ML  | Blind           | 3.49 [2.76, 4.12] | 2.91 [2.06, 3.75] | 2.47 [1.38, 3.55]   | 0.30 [0.10, 0.69] | -0.05 [-0.09, -0.02] | -0.42 [-0.70, -0.08] | 1.11 [0.96, 1.24]    |
| <i>DFT_M06-2X_SMD_implicit</i>       | QM       | Blind           | 4.16 [2.00, 6.38] | 2.80 [1.76, 4.33] | -0.07 [-1.61, 1.95] | 0.52 [0.39, 0.78] | 1.70 [0.80, 2.77]    | 0.70 [0.48, 0.88]    | 0.50 [0.30, 0.70]    |
| <i>DFT_M06-2X_SMD_implicit_SAS</i>   | QM       | Blind           | 4.16 [2.03, 6.44] | 2.81 [1.80, 4.36] | -0.20 [-1.71, 1.85] | 0.50 [0.36, 0.77] | 1.64 [0.72, 2.72]    | 0.56 [0.28, 0.81]    | 0.14 [0.02, 0.31]    |
| <i>DFT_M06-2X_SMD_explicit_water</i> | QM       | Blind           | 5.12 [1.19, 7.92] | 2.56 [0.96, 4.76] | -0.35 [-2.62, 1.93] | 0.20 [0.00, 0.81] | 1.10 [-0.39, 2.50]   | 0.46 [0.06, 0.78]    | 0.52 [0.29, 0.77]    |
| <i>Gaussian_corrected</i>            | QM+LEC   | Blind           | 5.36 [4.70, 5.95] | 5.12 [4.42, 5.79] | 5.12 [4.42, 5.79]   | 0.76 [0.63, 0.88] | 0.35 [0.27, 0.45]    | 0.60 [0.42, 0.76]    | 0.00 [-0.00, 0.00]   |

**Table S4. Evaluation statistics calculated for all log *D* estimates.** Predictions are represented a name based on method names participants submitted to the and log *P* challenges. There are six error metrics reported: the root-mean-squared error (RMSE), mean absolute error (MAE), mean (signed) error (ME), coefficient of determination ( $R^2$ ), linear regression slope (*m*), Kendall's Rank Correlation Coefficient ( $\tau$ ), and error slope (ES). The mean and 95% confidence intervals of each statistic is presented. This table is ranked by increasing RMSE.

| Method Name                                                | Category               | Submission Type | RMSE              | MAE               | ME                   | $R^2$             | <i>m</i>          | Kendall's Tau      | ES                 |
|------------------------------------------------------------|------------------------|-----------------|-------------------|-------------------|----------------------|-------------------|-------------------|--------------------|--------------------|
| <i>REF0 ChemAxon</i>                                       | Empirical              | Reference       | 1.06 [0.82, 1.27] | 0.91 [0.68, 1.14] | 0.28 [-0.14, 0.70]   | 0.27 [0.01, 0.58] | 0.54 [0.10, 0.90] | 0.31 [-0.02, 0.61] | 0.12 [-0.00, 0.28] |
| <i>TFE IEFPCM MST + IEFPCM/MST</i>                         | Physical (QM)          | Standard        | 1.27 [0.85, 1.64] | 0.98 [0.67, 1.33] | 0.24 [-0.28, 0.75]   | 0.55 [0.17, 0.87] | 1.31 [0.71, 1.70] | 0.57 [0.27, 0.82]  | 1.16 [0.89, 1.25]  |
| <i>NULL0</i>                                               | Empirical              | Reference       | 1.59 [1.22, 1.93] | 1.35 [1.00, 1.71] | 1.23 [0.81, 1.65]    | 0.00 [0.00, 0.00] | 0.00 [0.00, 0.00] | nan [nan, nan]     | 0.65 [0.44, 0.87]  |
| <i>EC_RISM</i>                                             | Physical (QM)          | Standard        | 1.69 [1.30, 2.05] | 1.43 [1.07, 1.82] | -1.43 [-1.81, -1.07] | 0.53 [0.20, 0.77] | 0.95 [0.54, 1.29] | 0.51 [0.21, 0.74]  | 0.84 [0.64, 1.02]  |
| <i>TFE-NHLBI-TZVP-QM + TZVP-QM</i>                         | Physical (QM)          | Standard        | 1.72 [1.30, 2.12] | 1.47 [1.12, 1.86] | 1.26 [0.78, 1.75]    | 0.25 [0.01, 0.64] | 0.64 [0.08, 1.25] | 0.38 [0.02, 0.70]  | 0.05 [-0.00, 0.18] |
| <i>TFE b3lypd3 + DFT_M05-2X_SMD</i>                        | Physical (QM)          | Standard        | 2.15 [1.56, 2.71] | 1.78 [1.31, 2.31] | 1.78 [1.31, 2.31]    | 0.32 [0.04, 0.66] | 0.80 [0.27, 1.30] | 0.41 [0.05, 0.72]  | 0.42 [0.27, 0.70]  |
| <i>MD (CGenFF/TIP3P) + Gaussian_corrected</i>              | Physical (MM) + QM+LEC | Standard        | 2.27 [1.97, 2.55] | 2.13 [1.80, 2.45] | 1.84 [1.21, 2.35]    | 0.62 [0.35, 0.84] | 1.53 [0.93, 2.18] | 0.62 [0.36, 0.82]  | 0.88 [0.75, 1.00]  |
| <i>TFE-SMD-solvent-opt + DFT_M06-2X_SMD_explicit_water</i> | Physical (QM)          | Standard        | 4.54 [2.09, 7.15] | 2.92 [1.88, 4.57] | 2.88 [1.80, 4.55]    | 0.25 [0.11, 0.76] | 1.92 [0.53, 4.45] | 0.55 [0.22, 0.80]  | 0.55 [0.38, 0.73]  |

Table S5. Additional info for microscopic  $pK_a$  predictions.

| Microstate    | Total number of relative free energy predictions | Average relative free energy prediction | Average relative free energy prediction STD | Minimum relative free energy prediction | Maximum relative free energy prediction | Number of (+) sign predictions | Number of (-) sign predictions | Number of neutral (0) sign predictions | Shannon entropy (H) |
|---------------|--------------------------------------------------|-----------------------------------------|---------------------------------------------|-----------------------------------------|-----------------------------------------|--------------------------------|--------------------------------|----------------------------------------|---------------------|
| SM25_micro001 | 9                                                | -0.6                                    | 13.2                                        | -15.6                                   | 16.3                                    | 4                              | 5                              | 0                                      | 0.7                 |
| SM25_micro002 | 8                                                | 8.8                                     | 10.6                                        | -7.5                                    | 20.4                                    | 6                              | 2                              | 0                                      | 0.6                 |
| SM25_micro003 | 8                                                | 9.6                                     | 2.7                                         | 4.5                                     | 12.6                                    | 8                              | 0                              | 0                                      | 0.0                 |
| SM25_micro004 | 2                                                | -8.9                                    | 4.5                                         | -12.1                                   | -5.8                                    | 0                              | 2                              | 0                                      | 0.0                 |
| SM25_micro005 | 2                                                | -0.8                                    | 2.1                                         | -2.3                                    | 0.7                                     | 1                              | 1                              | 0                                      | 0.7                 |
| SM26_micro001 | 9                                                | 7.3                                     | 2.4                                         | 3.0                                     | 10.7                                    | 9                              | 0                              | 0                                      | 0.0                 |
| SM26_micro002 | 8                                                | -6.7                                    | 20.5                                        | -31.7                                   | 22.1                                    | 3                              | 5                              | 0                                      | 0.7                 |
| SM26_micro003 | 8                                                | 20.9                                    | 12.0                                        | 0.9                                     | 32.4                                    | 8                              | 0                              | 0                                      | 0.0                 |
| SM26_micro004 | 2                                                | 4.3                                     | 0.7                                         | 3.8                                     | 4.8                                     | 2                              | 0                              | 0                                      | 0.0                 |
| SM26_micro005 | 2                                                | 8.1                                     | 2.6                                         | 6.3                                     | 10.0                                    | 2                              | 0                              | 0                                      | 0.0                 |
| SM27_micro001 | 9                                                | 13.4                                    | 4.9                                         | 6.1                                     | 19.0                                    | 9                              | 0                              | 0                                      | 0.0                 |
| SM28_micro001 | 9                                                | -5.7                                    | 25.0                                        | -39.0                                   | 23.5                                    | 4                              | 5                              | 0                                      | 0.7                 |
| SM28_micro002 | 8                                                | 17.1                                    | 8.0                                         | 8.2                                     | 26.5                                    | 8                              | 0                              | 0                                      | 0.0                 |
| SM28_micro003 | 8                                                | 0.9                                     | 8.3                                         | -10.0                                   | 12.6                                    | 4                              | 4                              | 0                                      | 0.7                 |
| SM28_micro004 | 2                                                | 25.1                                    | 9.1                                         | 18.7                                    | 31.5                                    | 2                              | 0                              | 0                                      | 0.0                 |
| SM29_micro001 | 9                                                | 12.6                                    | 4.3                                         | 6.3                                     | 18.7                                    | 9                              | 0                              | 0                                      | 0.0                 |
| SM30_micro001 | 9                                                | 12.3                                    | 4.2                                         | 5.9                                     | 17.7                                    | 9                              | 0                              | 0                                      | 0.0                 |
| SM31_micro001 | 9                                                | 13.2                                    | 4.4                                         | 6.0                                     | 18.1                                    | 9                              | 0                              | 0                                      | 0.0                 |
| SM31_micro002 | 3                                                | -0.6                                    | 6.6                                         | -8.1                                    | 4.5                                     | 2                              | 1                              | 0                                      | 0.6                 |
| SM32_micro001 | 9                                                | 12.8                                    | 4.6                                         | 5.9                                     | 18.9                                    | 9                              | 0                              | 0                                      | 0.0                 |
| SM33_micro001 | 9                                                | 11.9                                    | 3.9                                         | 5.2                                     | 17.1                                    | 9                              | 0                              | 0                                      | 0.0                 |
| SM34_micro001 | 9                                                | 13.0                                    | 4.6                                         | 5.7                                     | 19.7                                    | 9                              | 0                              | 0                                      | 0.0                 |
| SM34_micro002 | 3                                                | -0.9                                    | 6.4                                         | -8.1                                    | 4.4                                     | 2                              | 1                              | 0                                      | 0.6                 |
| SM35_micro001 | 9                                                | 11.7                                    | 4.5                                         | 3.2                                     | 16.2                                    | 9                              | 0                              | 0                                      | 0.0                 |
| SM35_micro002 | 8                                                | 0.2                                     | 1.4                                         | -1.9                                    | 2.5                                     | 5                              | 2                              | 1                                      | 0.9                 |
| SM35_micro003 | 8                                                | 12.2                                    | 5.6                                         | 3.2                                     | 18.1                                    | 8                              | 0                              | 0                                      | 0.0                 |
| SM36_micro001 | 9                                                | 10.8                                    | 3.1                                         | 5.2                                     | 14.9                                    | 9                              | 0                              | 0                                      | 0.0                 |
| SM36_micro002 | 8                                                | 1.2                                     | 1.8                                         | 0.0                                     | 4.4                                     | 4                              | 1                              | 3                                      | 1.0                 |
| SM36_micro003 | 8                                                | 10.7                                    | 3.3                                         | 5.2                                     | 14.7                                    | 8                              | 0                              | 0                                      | 0.0                 |
| SM37_micro001 | 9                                                | 0.1                                     | 9.4                                         | -11.7                                   | 13.7                                    | 5                              | 4                              | 0                                      | 0.7                 |
| SM37_micro002 | 8                                                | 9.8                                     | 2.9                                         | 3.7                                     | 12.7                                    | 8                              | 0                              | 0                                      | 0.0                 |
| SM37_micro003 | 8                                                | 0.7                                     | 1.8                                         | -1.5                                    | 4.2                                     | 4                              | 3                              | 1                                      | 1.0                 |
| SM37_micro004 | 8                                                | 8.9                                     | 3.0                                         | 3.8                                     | 12.4                                    | 8                              | 0                              | 0                                      | 0.0                 |
| SM37_micro005 | 7                                                | -2.7                                    | 7.6                                         | -10.6                                   | 11.0                                    | 3                              | 4                              | 0                                      | 0.7                 |
| SM38_micro001 | 9                                                | 11.6                                    | 4.6                                         | 5.2                                     | 17.5                                    | 9                              | 0                              | 0                                      | 0.0                 |
| SM39_micro001 | 9                                                | 10.1                                    | 3.1                                         | 5.1                                     | 14.6                                    | 9                              | 0                              | 0                                      | 0.0                 |
| SM40_micro001 | 9                                                | 10.8                                    | 3.3                                         | 5.0                                     | 15.7                                    | 9                              | 0                              | 0                                      | 0.0                 |
| SM40_micro002 | 8                                                | -1.8                                    | 10.3                                        | -15.5                                   | 11.8                                    | 4                              | 4                              | 0                                      | 0.7                 |
| SM41_micro001 | 9                                                | 8.4                                     | 3.5                                         | 2.2                                     | 14.8                                    | 9                              | 0                              | 0                                      | 0.0                 |
| SM41_micro002 | 8                                                | -0.5                                    | 9.9                                         | -12.9                                   | 13.9                                    | 4                              | 4                              | 0                                      | 0.7                 |
| SM42_micro001 | 9                                                | 5.5                                     | 4.6                                         | 0.2                                     | 12.3                                    | 9                              | 0                              | 0                                      | 0.0                 |
| SM42_micro002 | 8                                                | -0.2                                    | 8.6                                         | -10.8                                   | 14.3                                    | 4                              | 4                              | 0                                      | 0.7                 |
| SM42_micro003 | 3                                                | -2.0                                    | 3.0                                         | -5.1                                    | 1.0                                     | 1                              | 2                              | 0                                      | 0.6                 |
| SM43_micro001 | 9                                                | 5.9                                     | 4.4                                         | 0.5                                     | 13.4                                    | 9                              | 0                              | 0                                      | 0.0                 |
| SM43_micro002 | 8                                                | 0.1                                     | 9.4                                         | -11.0                                   | 11.0                                    | 4                              | 4                              | 0                                      | 0.7                 |
| SM43_micro003 | 8                                                | -11.6                                   | 38.1                                        | -60.9                                   | 38.2                                    | 4                              | 4                              | 0                                      | 0.7                 |
| SM43_micro004 | 2                                                | -3.6                                    | 2.2                                         | -5.2                                    | -2.1                                    | 0                              | 2                              | 0                                      | 0.0                 |
| SM43_micro005 | 2                                                | 0.1                                     | 0.4                                         | -0.2                                    | 0.4                                     | 1                              | 1                              | 0                                      | 0.7                 |
| SM44_micro001 | 9                                                | 9.5                                     | 2.9                                         | 4.3                                     | 12.9                                    | 9                              | 0                              | 0                                      | 0.0                 |
| SM44_micro002 | 8                                                | -1.1                                    | 7.4                                         | -10.3                                   | 9.9                                     | 4                              | 4                              | 0                                      | 0.7                 |
| SM45_micro001 | 9                                                | 9.6                                     | 3.1                                         | 4.4                                     | 14.7                                    | 9                              | 0                              | 0                                      | 0.0                 |
| SM45_micro002 | 8                                                | -1.0                                    | 7.8                                         | -11.0                                   | 9.6                                     | 4                              | 4                              | 0                                      | 0.7                 |
| SM46_micro001 | 9                                                | 9.9                                     | 4.1                                         | 4.0                                     | 18.4                                    | 9                              | 0                              | 0                                      | 0.0                 |
| SM46_micro002 | 8                                                | -0.7                                    | 7.5                                         | -9.6                                    | 10.5                                    | 4                              | 4                              | 0                                      | 0.7                 |
| SM46_micro003 | 8                                                | -12.2                                   | 37.1                                        | -63.5                                   | 39.0                                    | 4                              | 4                              | 0                                      | 0.7                 |
| SM46_micro004 | 3                                                | 6.3                                     | 4.5                                         | 2.4                                     | 11.3                                    | 3                              | 0                              | 0                                      | 0.0                 |



**Table S6. SMILES and compound class of SAMPL7 physical property challenge molecules.** A view of the compounds and their classes can be found in Figure S3.

| SAMPL7 Molecule ID | Compound Class       | Isomeric SMILES                                                     |
|--------------------|----------------------|---------------------------------------------------------------------|
| <b>SM25</b>        | acylsulfonamide      | <chem>O=C(NS(C1=CC=CC=C1)(=O)=O)CCC2=CC=CC=C2</chem>                |
| <b>SM26</b>        | acylsulfonamide      | <chem>O=S(CCC1=CC=CC=C1)(NC(C)=O)=O</chem>                          |
| <b>SM27</b>        | oxetane              | <chem>O=S(CCC1=CC=CC=C1)(NC2(C)COC2)=O</chem>                       |
| <b>SM28</b>        | thietane-1,1-dioxide | <chem>O=S(CC1(NC(C)=O)CCC2=CC=CC=C2)(C1)=O</chem>                   |
| <b>SM29</b>        | oxetane              | <chem>CS(NC1(COC1)CCC2=CC=CC=C2)(=O)=O</chem>                       |
| <b>SM30</b>        | oxetane              | <chem>O=S(NC1(COC1)CCC2=CC=CC=C2)(C3=CC=CC=C3)=O</chem>             |
| <b>SM31</b>        | oxetane              | <chem>O=S(NC1(COC1)CCC2=CC=CC=C2)(N(C)C)=O</chem>                   |
| <b>SM32</b>        | thietane             | <chem>CS(NC1(CSC1)CCC2=CC=CC=C2)(=O)=O</chem>                       |
| <b>SM33</b>        | thietane             | <chem>O=S(NC1(CSC1)CCC2=CC=CC=C2)(C3=CC=CC=C3)=O</chem>             |
| <b>SM34</b>        | thietane             | <chem>O=S(NC1(CSC1)CCC2=CC=CC=C2)(N(C)C)=O</chem>                   |
| <b>SM35</b>        | thietane-1-oxide     | <chem>CS(N[C@@]1(C[S+][O-])C1)CCC2=CC=CC=C2)(=O)=O</chem>           |
| <b>SM36</b>        | thietane-1-oxide     | <chem>O=S(N[C@@]1(C[S+][O-])C1)CCC2=CC=CC=C2)(C3=CC=CC=C3)=O</chem> |
| <b>SM37</b>        | thietane-1-oxide     | <chem>O=S(N[C@@]1(C[S+][O-])C1)CCC2=CC=CC=C2)(N(C)C)=O</chem>       |
| <b>SM38</b>        | thietane-1,1-dioxide | <chem>CS(NC1(CS(C1)(=O)=O)CCC2=CC=CC=C2)(=O)=O</chem>               |
| <b>SM39</b>        | thietane-1,1-dioxide | <chem>O=S(NC1(CS(C1)(=O)=O)CCC2=CC=CC=C2)(C3=CC=CC=C3)=O</chem>     |
| <b>SM40</b>        | thietane-1,1-dioxide | <chem>O=S(NC1(CS(C1)(=O)=O)CCC2=CC=CC=C2)(N(C)C)=O</chem>           |
| <b>SM41</b>        | isoxazole            | <chem>O=S(NC1=NOC(C2=CC=CC=C2)=C1)(C)=O</chem>                      |
| <b>SM42</b>        | isoxazole            | <chem>O=S(NC1=NOC(C2=CC=CC=C2)=C1)(C3=CC=CC=C3)=O</chem>            |
| <b>SM43</b>        | isoxazole            | <chem>O=S(NC1=NOC(C2=CC=CC=C2)=C1)(N(C)C)=O</chem>                  |
| <b>SM44</b>        | 1,2,3-triazole       | <chem>O=S(NC(N=N1)=CN1C2=CC=CC=C2)(C)=O</chem>                      |
| <b>SM45</b>        | 1,2,3-triazole       | <chem>O=S(NC(N=N1)=CN1C2=CC=CC=C2)(C3=CC=CC=C3)=O</chem>            |
| <b>SM46</b>        | 1,2,3-triazole       | <chem>O=S(NC(N=N1)=CN1C2=CC=CC=C2)(N(C)C)=O</chem>                  |

| Compound Classes     | Structures                                                                                                                                                                 |
|----------------------|----------------------------------------------------------------------------------------------------------------------------------------------------------------------------|
| acylsulfonamide      | 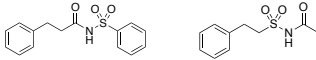<br>SM25                      SM26                                                        |
| oxetane              | <br>SM27                      SM29                      SM30                      SM31   |
| thietane             | <br>SM32                      SM33                      SM34                             |
| thietane-1-oxide     | <br>SM35                      SM36                      SM37                            |
| thietane-1,1-dioxide | <br>SM28                      SM38                      SM39                      SM40 |
| isoxazole            | <br>SM41                      SM42                      SM43                           |
| 1,2,3-triazole       | <br>SM44                      SM45                      SM46                           |

**Figure S3. Compound classes and structures of the molecules in the SAMPL7 physical property challenge.** SMILES of the compounds are in Table S3.

**Table S7. Number of states per charge state for the microstates used in the SAMPL7  $pK_a$  challenge.** The total number of microstates (protomers and tautomers) is listed. Some of the molecules have up to 6 microstates, while others have only 2.

|             | Charge State |    |   |    | Total # |
|-------------|--------------|----|---|----|---------|
|             | +2           | +1 | 0 | -1 |         |
| <b>SM25</b> | 0            | 1  | 3 | 2  | 6       |
| <b>SM26</b> | 0            | 1  | 3 | 2  | 6       |
| <b>SM27</b> | 0            | 0  | 1 | 1  | 2       |
| <b>SM28</b> | 0            | 1  | 2 | 2  | 5       |
| <b>SM29</b> | 0            | 0  | 1 | 1  | 2       |
| <b>SM30</b> | 0            | 0  | 1 | 1  | 2       |
| <b>SM31</b> | 0            | 1  | 1 | 1  | 3       |
| <b>SM32</b> | 0            | 0  | 1 | 1  | 2       |
| <b>SM33</b> | 0            | 0  | 1 | 1  | 2       |
| <b>SM34</b> | 0            | 1  | 1 | 1  | 3       |
| <b>SM35</b> | 0            | 0  | 2 | 3  | 5       |
| <b>SM36</b> | 0            | 0  | 2 | 3  | 5       |
| <b>SM37</b> | 0            | 2  | 2 | 2  | 6       |
| <b>SM38</b> | 0            | 0  | 1 | 1  | 2       |
| <b>SM39</b> | 0            | 0  | 1 | 1  | 2       |
| <b>SM40</b> | 0            | 1  | 1 | 1  | 3       |
| <b>SM41</b> | 0            | 1  | 1 | 1  | 3       |
| <b>SM42</b> | 0            | 1  | 2 | 1  | 4       |
| <b>SM43</b> | 1            | 2  | 2 | 1  | 6       |
| <b>SM44</b> | 0            | 1  | 1 | 1  | 3       |
| <b>SM45</b> | 0            | 1  | 1 | 1  | 3       |
| <b>SM46</b> | 1            | 2  | 1 | 1  | 5       |
